# Supplementary material
Source: PubMed Central journal article supplement (PMC2584710)
Supplement: 0809583105_ST1.pdf [file 0809583105_ST1.pdf]

**Table S1. Twelve of the most and least successfully predicted target biological process annotations**

| Successful                                     | Unsuccessful                                         |
|------------------------------------------------|------------------------------------------------------|
| mRNA metabolic process                         | Secondary metabolic process                          |
| Transcription from RNA polymerase III promoter | Response to inorganic substance                      |
| rRNA metabolic process                         | Regulation of translation                            |
| Regulation of progression through cell cycle   | Fermentation                                         |
| Hydrogen transport                             | Second-messenger-mediated signaling                  |
| Nucleocytoplasmic transport                    | Cellular respiration                                 |
| DNA replication                                | Oxygen and reactive oxygen species metabolic process |
| Cytoskeleton organization and biogenesis       | Lipid metabolic process                              |
| Proteolysis                                    | Vitamin metabolic process                            |
| Ribosome biogenesis and assembly               | Cell wall organization and biogenesis                |
| Small GTPase mediated signal transduction      | Protein processing                                   |
| Vesicle-mediated transport                     | Lipid transport                                      |

The biological process annotations (BP) of the most and least likely target proteins to be annotated correctly with zorch integrated by Generalized Functional Linkages (GFL) are shown. Predictions were made with uniform priors and evaluated at 206 general BP. In general, those proteins involved in stable complexes were among the most accurately predicted.
