# Supplementary material
Source: PubMed Central journal article supplement (PMC2584710)
Supplement: 0809583105_ST2.pdf [file 0809583105_ST2.pdf]

**Table S2. Confidence in GO evidence codes assayed by assuming GFL prediction was independent of evidence class**

| <b>Code</b> | <b>Evidence class</b>           | <b>Confidence</b> |
|-------------|---------------------------------|-------------------|
| <b>TAS</b>  | Traceable author statement      | 0.96              |
| <b>IMP</b>  | Molecular phenotype             | 0.93              |
| <b>IDA</b>  | Direct assay                    | 0.92              |
| <b>IGI</b>  | Genetic interaction             | 0.91              |
| <b>ISS</b>  | Sequence similarity             | 0.83              |
| <b>RCA</b>  | Reviewed computational analysis | 0.78              |
| <b>IEP</b>  | Expression profile              | 0.68              |
| <b>IC</b>   | Inferred by curator             | NA                |
| <b>IPI</b>  | Inferred by protein interaction | NA                |

A baseline confidence of 0.95 was assumed for TAS, IDA, and IC combined. IC had too few examples for separate analysis; IPI was not assayed due to influence of protein interactions on zorch. Although the relative ranking may be robust, the probabilities depend on the specificity of the GO terms: we used 206 general terms.
